# Supplementary material
Source: PubMed Central journal article supplement (PMC4815106)
Supplement: supp_tpc.15.00227_TPC2015-00227-RAR2_Supplemental_Material.pdf [file supp_tpc.15.00227_TPC2015-00227-RAR2_Supplemental_Material.pdf]

Supplemental Data. Zhao et al. (2015). Plant Cell 10.1105/tpc.15.00227

**The interaction between rice ERF3 and WOX1 1 promotes crown root development by regulating gene expression involved in cytokinin signaling**

Yu Zhao, Saifeng Cheng, Yaling Song, Yulan Huang, Shaoli Zhou, Xiaoyun Liu, Dao-Xiu Zhou

**SUPPLEMENTAL DATA**

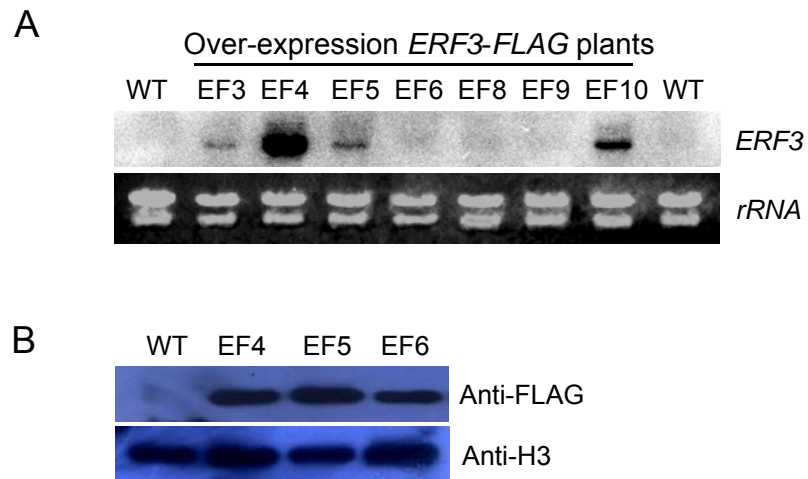

**Supplemental Figure 1.** Detection of *ERF3* mRNA and protein in *ERF3-FLAG* transgenic plants (EF) and wild type (WT) by RNA gel blot (**A**) and immunoblot (**B**).

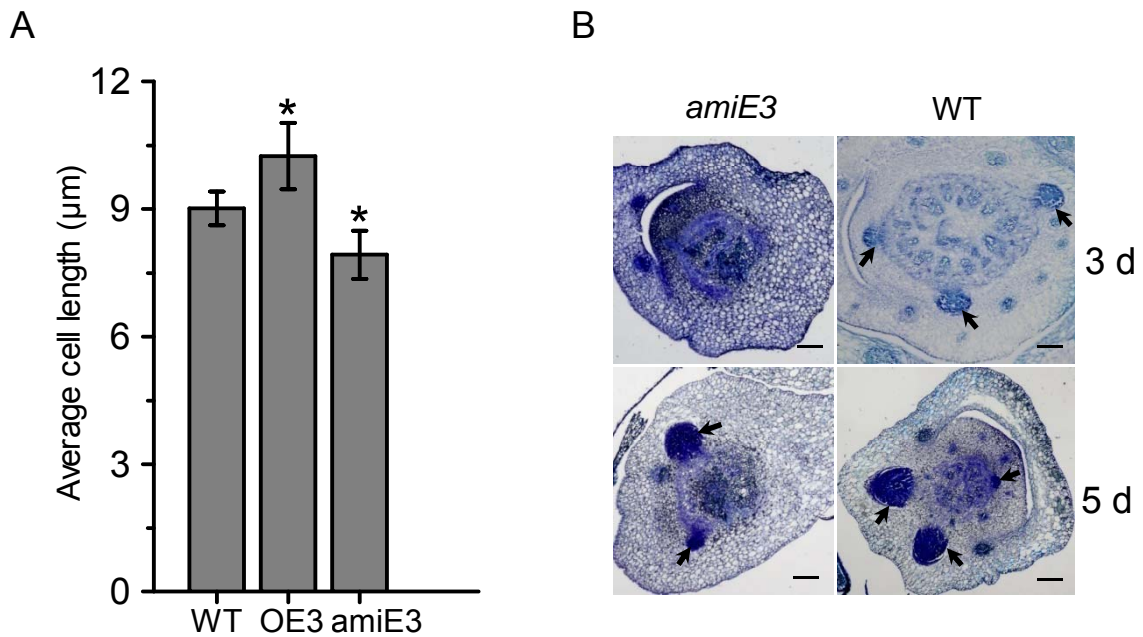

**Supplemental Figure 2.** Cell longitudinal lengths in root meristem zone and crown root primordium numbers in *ERF3* transgenic plants and wild-type seedlings. **A.** Cell longitudinal lengths in root meristem zone of *ERF3* over-expression (*OE3*, n=20), artificial microRNAs (*amiE3*, n=17) and wild-type (WT, n=16) plants. Error bars represent SD. \*,  $P < 0.05$ , *t*-test. **B.** Crown root primordium numbers in *ERF3* artificial microRNAs (*amiE3*) and wild-type (WT) seedlings at 3 and 5 days after germination as indicated. Arrows indicate emerging crown root initials. Bar=50 µm.

P2: CGGCGGGCGGGCGCCGCCGCCGGGCGAGG  
P1: CTTTCTTTTCTGCCGCCAGAACAGCAA  
P3: TTGCTCGCCTCGCCGCCGACGCATGAT

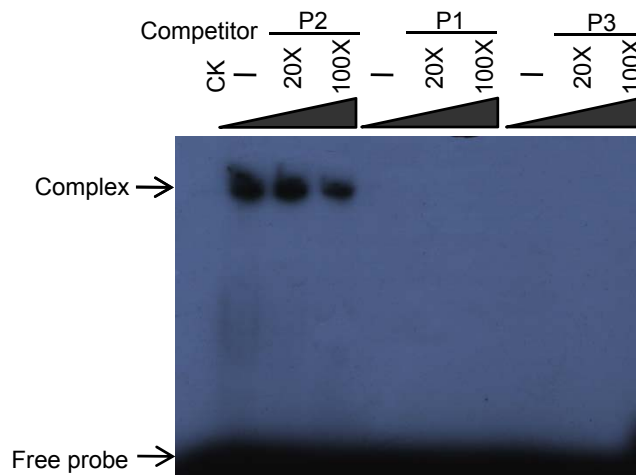

**Supplemental Figure 3.** Gel shift assay of ERF3 protein binding to P1, P2 and P3 regions of *RR2* containing the ERF binding sites ( underlined). *E. coli*-produced ERF3 protein was incubated with <sup>32</sup>P-labeled P1, P2 and P3 and analyzed by eletrophoresis. The shifted band is indicated by the arrow.

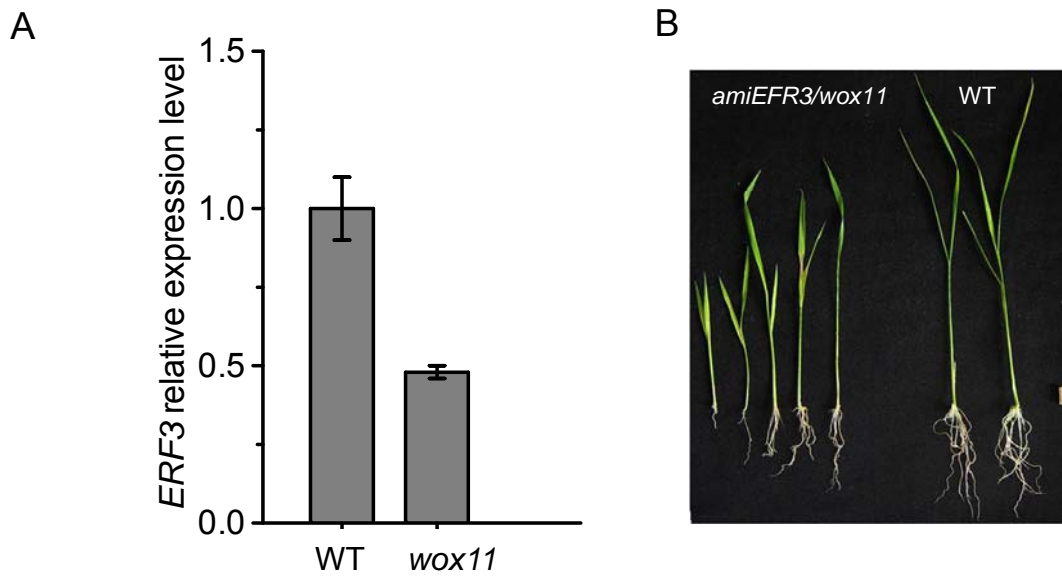

**Supplemental Figure 4.** Detection of expression level of *ERF3* in wild type (WT) and *wox11* (**A**) and phenotype of crown root of *amiERF3/wox11* transgenic plants at rooting stage (**B**). Bar=1 cm.

A

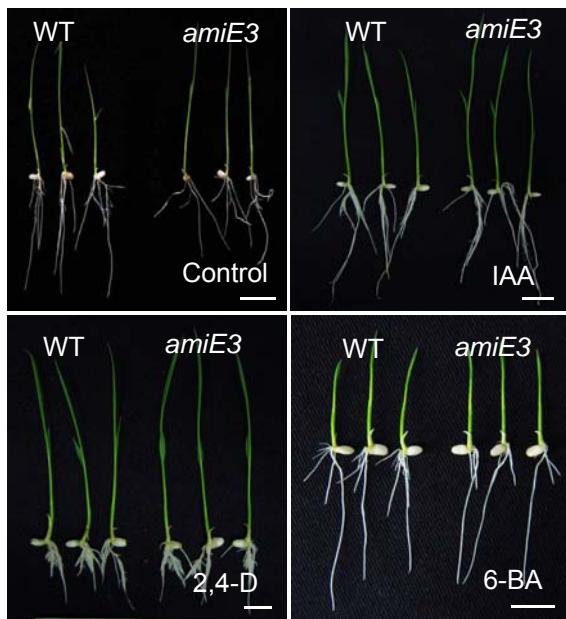

B

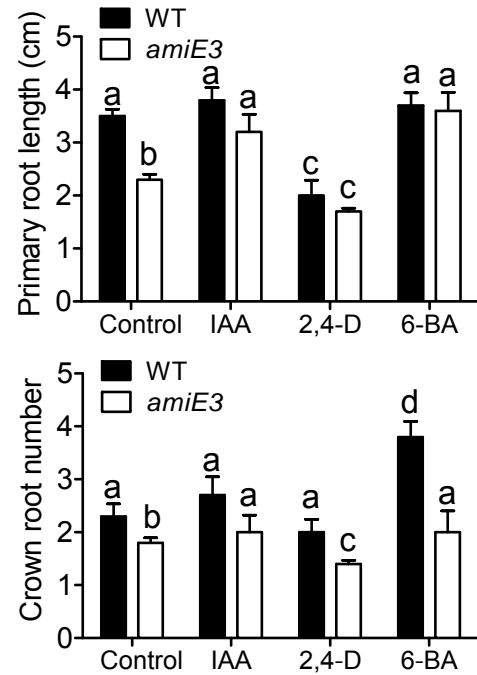

**Supplemental Figure 5.** Auxin (2,4-D and IAA) and cytokinin (6-BA) partially rescued the root phenotype of *ERF3* artificial microRNAs (*amiE3*) transgenic plants. Different letters in B represent significant differences at  $P < 0.05$ ,  $t$ -test. Bar=1 cm.

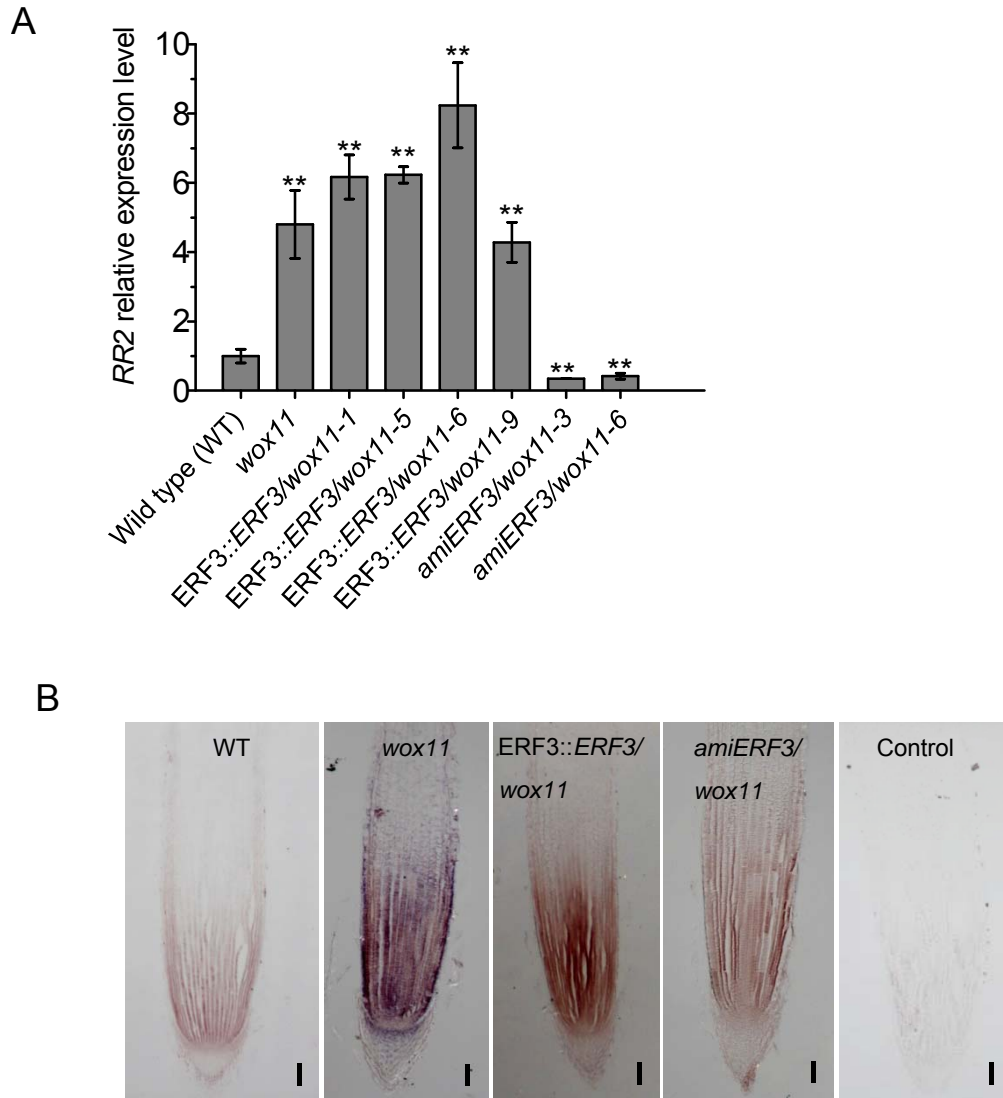

**Supplemental Figure 6.** RT-qPCR (**A**) and *in situ* hybridization (**B**) detection of *RR2* expression in *wox11*, *ERF3::ERF3/wox11*, *amiERF3/wox11* plants and wild-type (WT) roots. Error bars in (A) represent SD. \*,  $P < 0.05$ ; \*\*,  $P < 0.01$ . Bar = 75  $\mu\text{m}$  in (B).

**Supplemental Table 1.** Primers Used in This Study

| Experiments      | Name                  | Primer Sequence                          |
|------------------|-----------------------|------------------------------------------|
| Vector           | WOX11(2YH)-F          | ATAGTCGACACAAGGCAGCTAGCTAGTG             |
| constructs       | WOX11(2YH)-R          | ATAACTAGTATACGTACGTTGCCATCGA             |
|                  | ERF3Protein-F         | AAGAAGAAGGGATCCATGGCGCCCAGAGCAGCTAC      |
|                  | ERF3Protein-R         | AAGAAGAAGGTCGACCTAGTTCTCTACCGGCGGCGG     |
|                  | ERF3BiFC-F            | GGGGGATCCACTTGTAACCTGCTGCACCC            |
|                  | ERF3BiFC-R            | GTCGTCGACCATCCTGAGCTAGTTCTCTACC          |
|                  | ERF3ox-F              | GGGGGTACCACTTGTAACCTGCTGCACC             |
|                  | ERF3ox-R              | CGCGGATCCCTAGTTCTCTACCGGCGGCGG           |
|                  | ERF3miR-s             | AGTAAAGTAAGGATGCGTTGCTTCAGGAGATTCAGTTTGA |
|                  | ERF3miR-a             | TGAAGCAACGCATCCTTACTTTACTGCTGCTGCTACAGCC |
|                  | ERF3miR*s             | CTAAGCATCGCTTCCTTACTTTATTCTGCTGCTAGGCTG  |
|                  | ERF3miR*a             | AATAAAGTAAGGAAGCGATGCTTAGAGAGGGCAAAGTGAA |
|                  | ERF3flag-F            | GGGGGTACCACTTGTAACCTGCTGCACC             |
|                  | ERF3flag-R            | GGGGGATCCCCGGTTCAGATCCAGATCG             |
|                  | ERF3pgus-F            | CGCGGATCCGCTAGCAGCGCCTGGTACAT            |
|                  | ERF3pgus-R            | ACGCGTCGACGTGTTTTGGGAGGTTGGGTT           |
|                  | RiRR2-F(in situ)      | GGGACTAGTGGTACCGTCGTCGGAGAATGAGCC        |
|                  | RiRR2-R(in situ)      | GGGGAGCTCGGATCCGACCATCTGTGCAGGAGC        |
|                  | OxRR2-F               | CGGGGTACCTGTGTGGGTGAGACCTGAGA            |
|                  | OxRR2-R               | CGCGGATCCGAGGAGGCTGCTGCCATT              |
|                  | In situ hybridization | ERF3situ-F                               |
| ERF3situ-R       |                       | GGGGAGCTCGGATCCTTCAGATCCAGATCGAAAGCT     |
| Gel shift assays | EMSAp1-F              | TTTCTTTTCTGCCGCCAGAACAGCAA               |
|                  | EMSAp1-R              | TTGCTGTTCTGGCGGCAGAAAAGAAA               |
|                  | EMSAp2-F              | CGGCGGCGGCGCCGCCGCGGCGAGG                |
|                  | EMSAp2-R              | CCTCGCCGGCGGCGGCGCCGCCGCCG               |
|                  | EMSAp2d-F             | CGGCGGCGGCGCCGCCGAGG                     |
|                  | EMSAp2d-R             | CCTCGCCCGGCGCCGCCGCCG                    |
|                  | EMSAp3-F              | TGCTCGCCTCGCCGCCGACGCATG                 |
|                  | EMSAp3-R              | CATGCGTCGGCGGCGAGGCGAGCA                 |



|                     |               |                            |
|---------------------|---------------|----------------------------|
| ChIP assays         | ERF3ChIPs4-F  | TGTGGGTGAGACCTGAGAGGA      |
|                     | ERF3 ChIPs4-R | GAGAAGCAGCTCCACGAC         |
|                     | ERF3ChIPs5-F  | GAGGGTGCTGGTGGTGGACGACTC   |
|                     | ERF3ChIPs5-R  | ACGGTAGCGCTCACCGTGGAAC     |
|                     | ERF3ChIPs6-F  | CCACGGTGAGCGCTACCGTCTC     |
|                     | ERF3ChIPs6-R  | GGTGACTGGAGGATCGAGGA       |
| Expression analysis | ERF3qPCR-F    | TGCACGTCCAGCAACGCATC       |
|                     | ERF3qPCR-R    | TGCCGCCTTGTTCCCGTA         |
|                     | RR1qPCR-F     | AGGATCAGCAGATGCATGAATG     |
|                     | RR1qPCR-R     | GAGACGCTGTACGTCCTTGCTT     |
|                     | RR2qPCR-F     | ACGATCTTCTCAAAGCCATCAAG    |
|                     | RR2qPCR-R     | TGAGAGGCTTAAGGATGAAATCCT   |
|                     | RR3qPCR-F     | AGGGTTCGATCTCCTCAAGAG      |
|                     | RR3qPCR-R     | GAATTCTCCGACGACATTAGC      |
|                     | RR4qPCR-F     | GCGATTTGCTGTGGAGATTC       |
|                     | RR4qPCR-R     | GTGTGGCTGGCTTGGCTA         |
|                     | CRL1qPCR-F    | ATGACGGGATTTGGATCGC        |
|                     | CRL1qPCR-R    | CTTGCTCGTGGCAGAAGTAT       |
|                     | CRL4qPCR-F    | GGATTGGGAATGCTACTTCG       |
|                     | CRL4qPCR-R    | CCTTCTTTGGGTCTCTGTTG       |
|                     | CRL5qPCR-F    | CCCTTCCACACACATCAACT       |
|                     | CRL5qPCR-R    | CTCCTTAAGTGAGCCACATACTC    |
|                     | IAA5qPCR-F    | GAAATTGAAAATCATGAGAGGATCTG |
|                     | IAA5qPCR-R    | TGCTCTGCCCTGACTGCTCTA      |
|                     | IAA11qPCR-F   | CGACGTCGCCATGTACAAGA       |
|                     | IAA11qPCR-R   | TGGTGAAGGAGGTGAACATGTT     |
|                     | IAA23qPCR-F   | TGCCACCTACGAGGACAAG        |
|                     | IAA23qPCR-R   | TTGCAGGACTCGACGAACATC      |
|                     | IAA31qPCR-F   | CGACGTCCATTTCGAGATGT       |
|                     | IAA31qPCR-R   | TTGCTCCTAGGCCTCTTGCTT      |
|                     | WOX11qPCR-F   | CCAGATGGGCGAGAGCTACT       |
|                     | WOX11qPCR-R   | CGTTGCCATCGATCAATCAA       |
|                     | ACTIN1qPCR -F | TGTATGCCAGTGGTTCGTACCA     |
|                     | ACTIN1qPCR -R | CCAGCAAGGTCGAGACGAA        |
